# Supplementary material
Source: publisher figshare collection journal article supplement (https://acs.figshare.com/ndownloader/files/5840598)

# **Synthesis of a Nitrogen Analogue of Sphingomyelin as a Sphingomyelinase Inhibitor**

Toshikazu Hakogi, Misako Taichi, Shigeo Katsumura\*

**Supporting Information**

22-JUL-2002 11:48:15.00

DFILE :  
SFILE :

COMNT : KATSUMURA-LAB  
EXMOD : SINGL  
IRMOD : NON  
POINT : 32768  
FREQ : 7993.61 HZ  
SCANS : 8  
DUMMY : 4  
ACQIM : 4.0993 sec  
PD : 2.9007 sec  
RGAIN : 13  
PM1 : 5.50 usec

OPNUC : 1H  
OFPRQ : 399.65 MHz  
OBSET : 134500.00 HZ

IRNUC : 1H  
IRFRQ : 399.65 MHz  
IRSET : 134500.00 HZ  
IRAIN : 541  
IRAPW : 50.0 usec  
IRBP1 : 27  
IRBP2 : 6  
IRRNS : 0

ADBIT : 16  
CTEMP : 25.4 C  
CSPED : 13 HZ  
SLVNT : CDCL3

RESOL : 0.24 HZ  
BF : 0.01 HZ  
T1 : 0.00 %  
T2 : 0.00 %  
T3 : 90.00 %  
T4 : 100.00 %  
REFVL : 0.00 ppm  
XE : 3997.53 HZ  
XS : 37.45 HZ  
operator

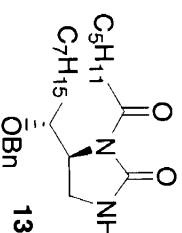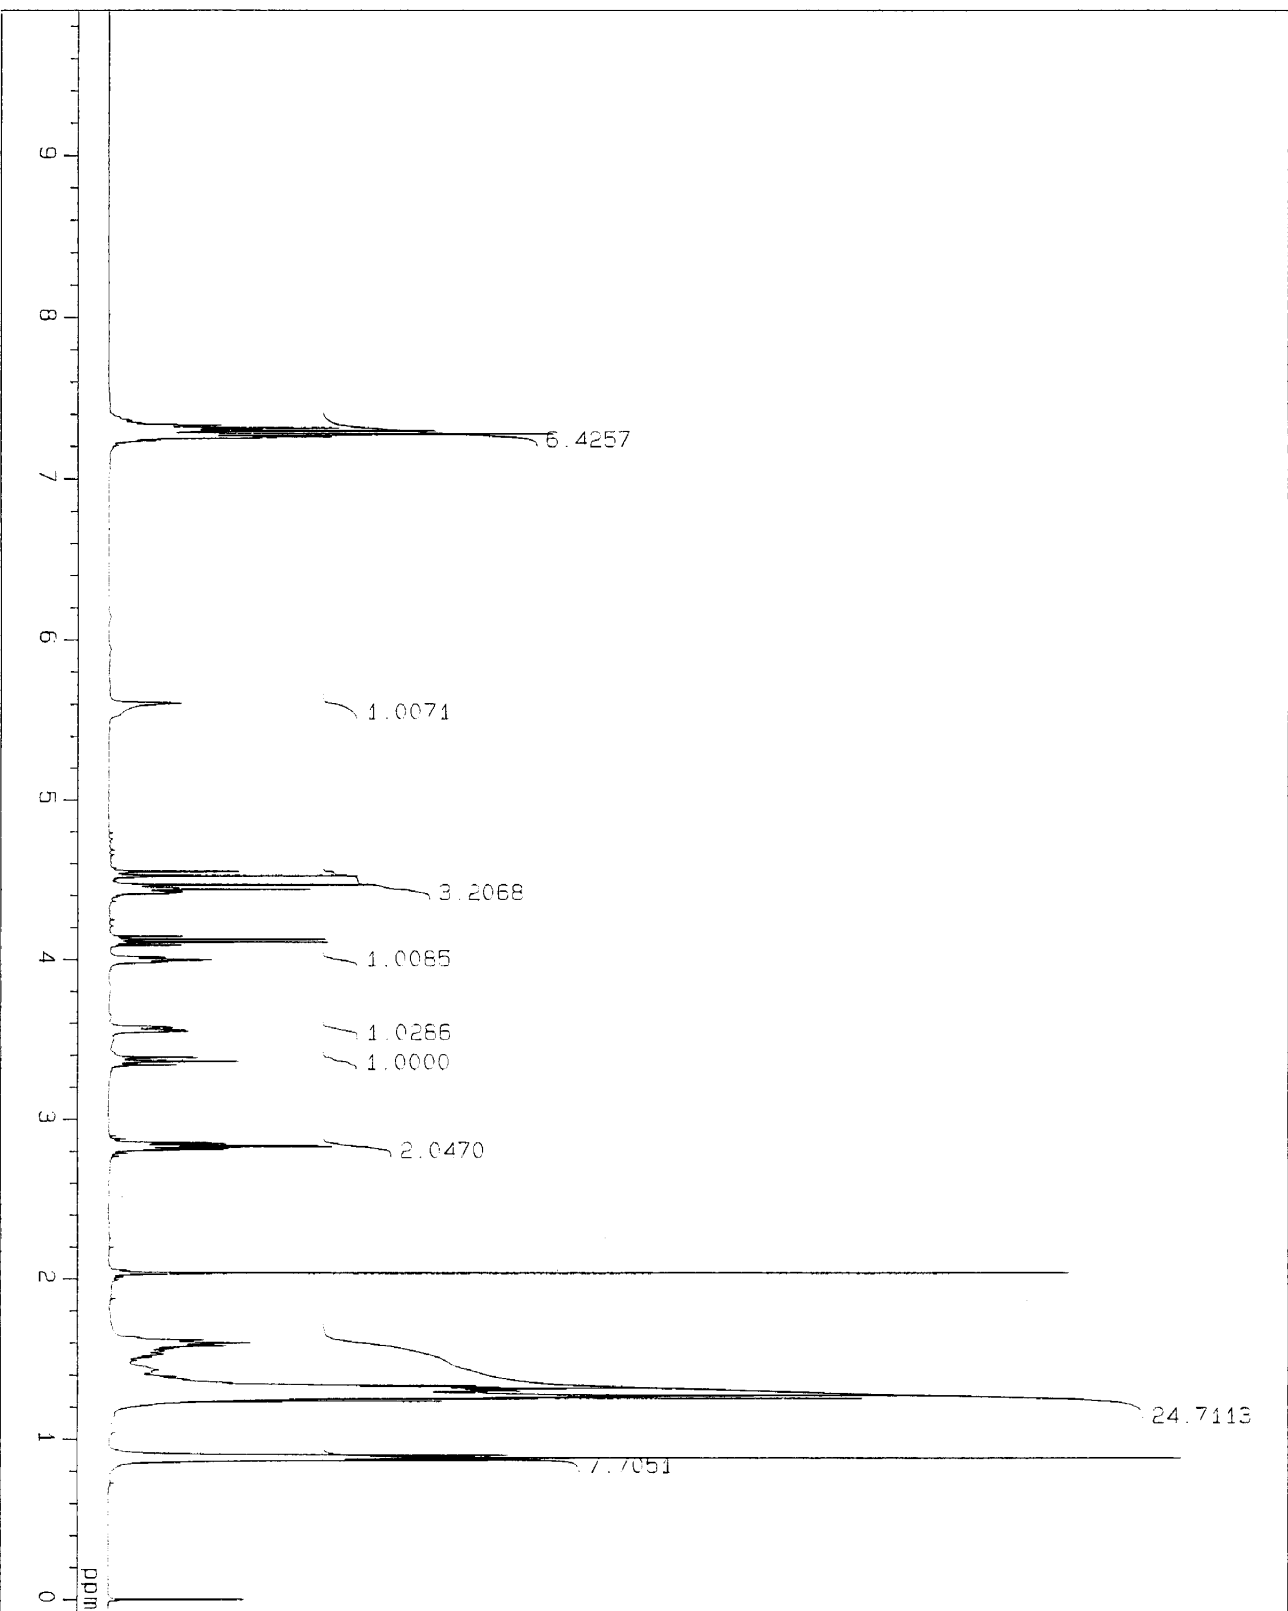

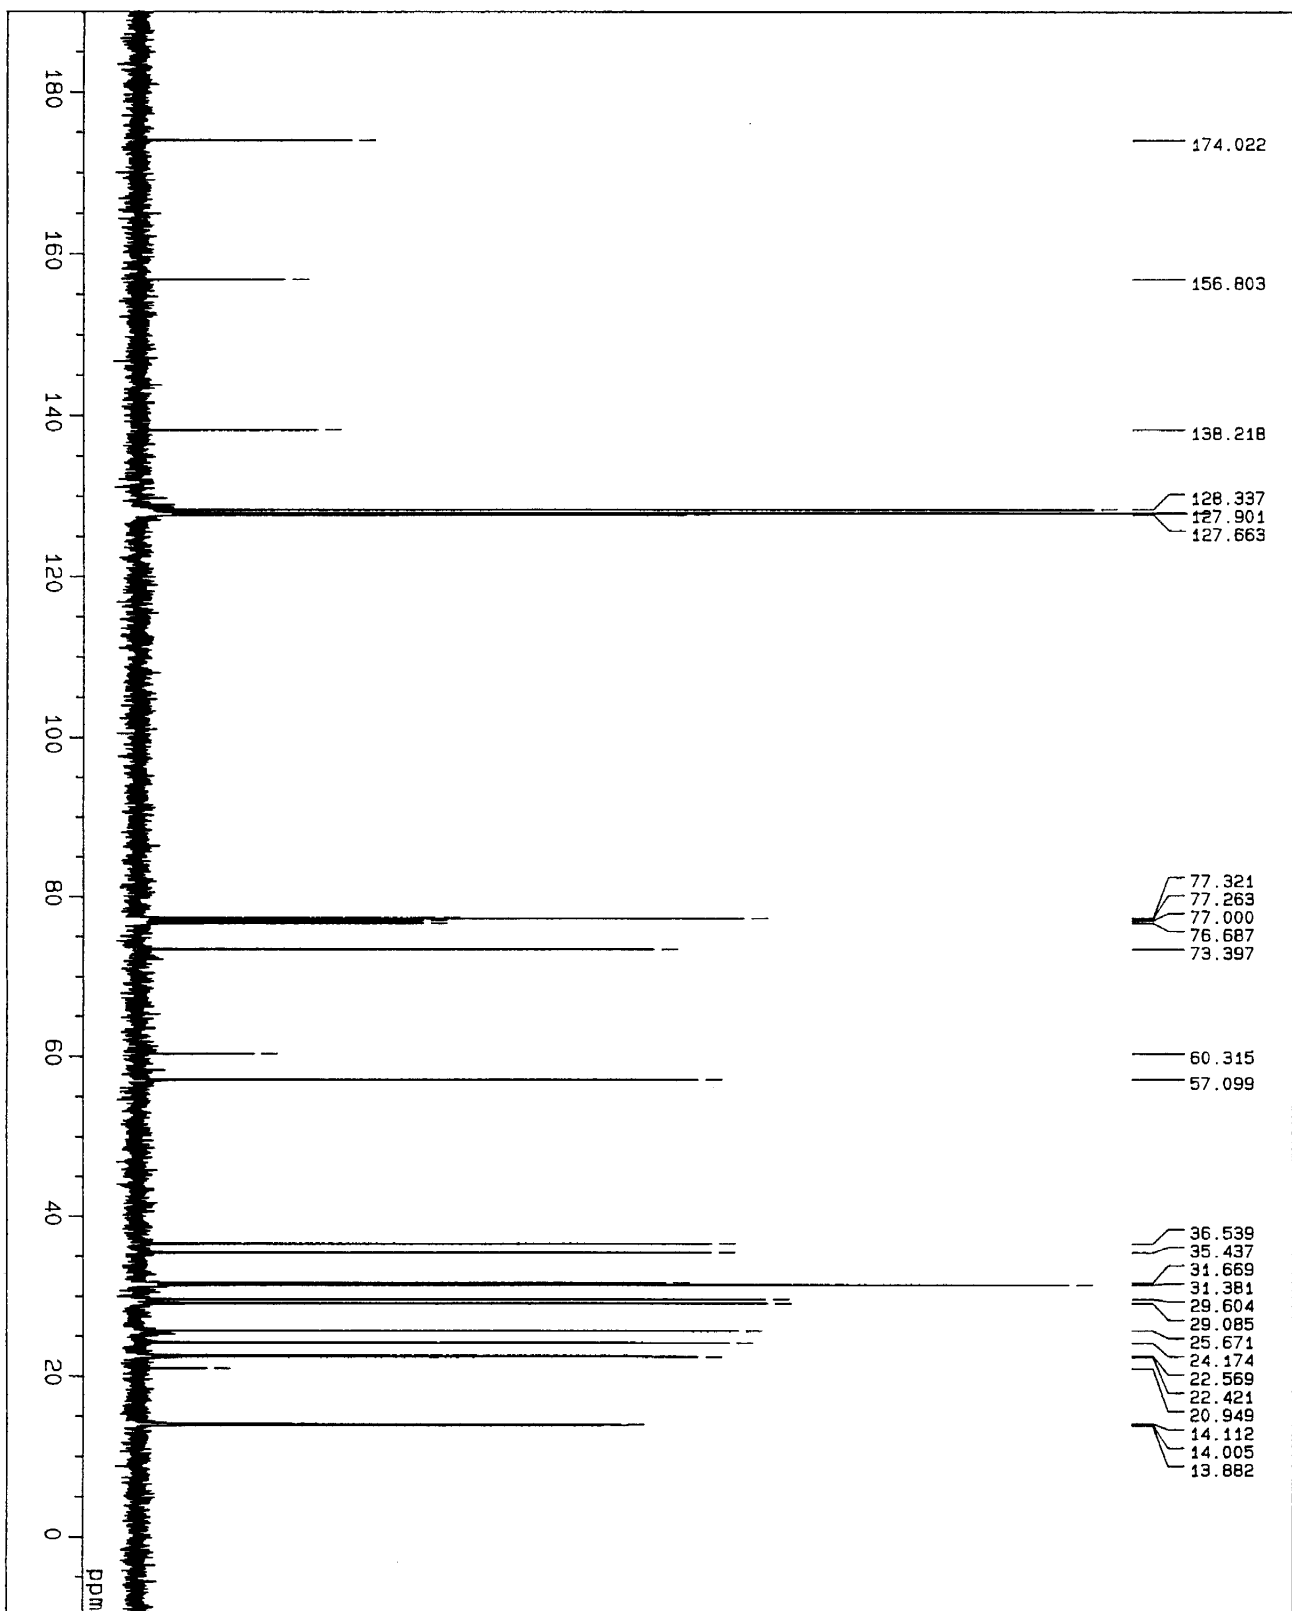

22-JUL-2002 11:40:47.58

DFILE :  
SFILE :

COMNT : KATSUMURA-LAB  
EXMOD : SINGL  
IRMOD : BCM  
POINT : 32768  
FREQU : 27100.27 Hz  
SCANS : 118  
DUMMY : 4  
ACQTM : 0.6046 sec  
PD : 0.8000 sec  
RGAIN : 23  
PW1 : 5.15 usec

OBNUC : 13C  
OBFRQ : 100.40 MHz  
OBSET : 135500.00 Hz

IRNUC : 1H  
IRFRQ : 399.65 MHz  
IRSET : 134500.00 Hz  
IRATN : 511  
IRAPW : 50.0 usec  
IRBP1 : 27  
IRBP2 : 6  
IRPNS : 0

ADBIT : 16  
CTEMP : 25.7 C  
CSPED : 13 Hz  
SLVNT : CDCL3

RESOL : 0.83 Hz  
BF : 2.00 Hz  
T1 : 0.00 %  
T2 : 0.00 %  
T3 : 90.00 %  
T4 : 100.00 %  
REFVL : 77.00 ppm  
XE : 20104.39 Hz  
XS : 1056.54 Hz  
operator

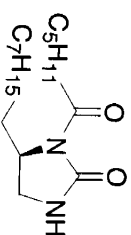

18-MAY-2002 15:15:53.60

DFILE :  
SFILE :

COMNT :  
EXMOD : SINGL  
IPMOD : NON  
POINT : 32768  
FREQ : 7993.61 Hz  
SCANS : 8  
DUMMY : 4  
ACQTM : 4.0993 sec  
PD : 2.9007 sec  
RGAIN : 18  
PW1 : 5.50 usec

OBNUC : <sup>1</sup>H  
OBFRQ : 399.65 MHz  
OBSET : 134500.00 Hz

IRNUC : <sup>1</sup>H  
IRFRQ : 399.65 MHz  
IRSET : 134500.00 Hz  
IRATN : 511  
IRRPW : 50.0 usec  
IRBP1 : 27  
IRBP2 : 6  
IRRNS : 0

ADBIT : 16  
CTEMP : 26.2 C  
CSPED : 12 Hz  
SLVNT : CD3OD

RESOL : 0.24 Hz  
BF : 0.04 Hz  
T1 : 0.00 %  
T2 : 0.00 %  
T3 : 90.00 %  
T4 : 100.00 %  
REFVL : 0.00 ppm  
XE : 3997.53 Hz  
XS : 642.67 Hz  
operator

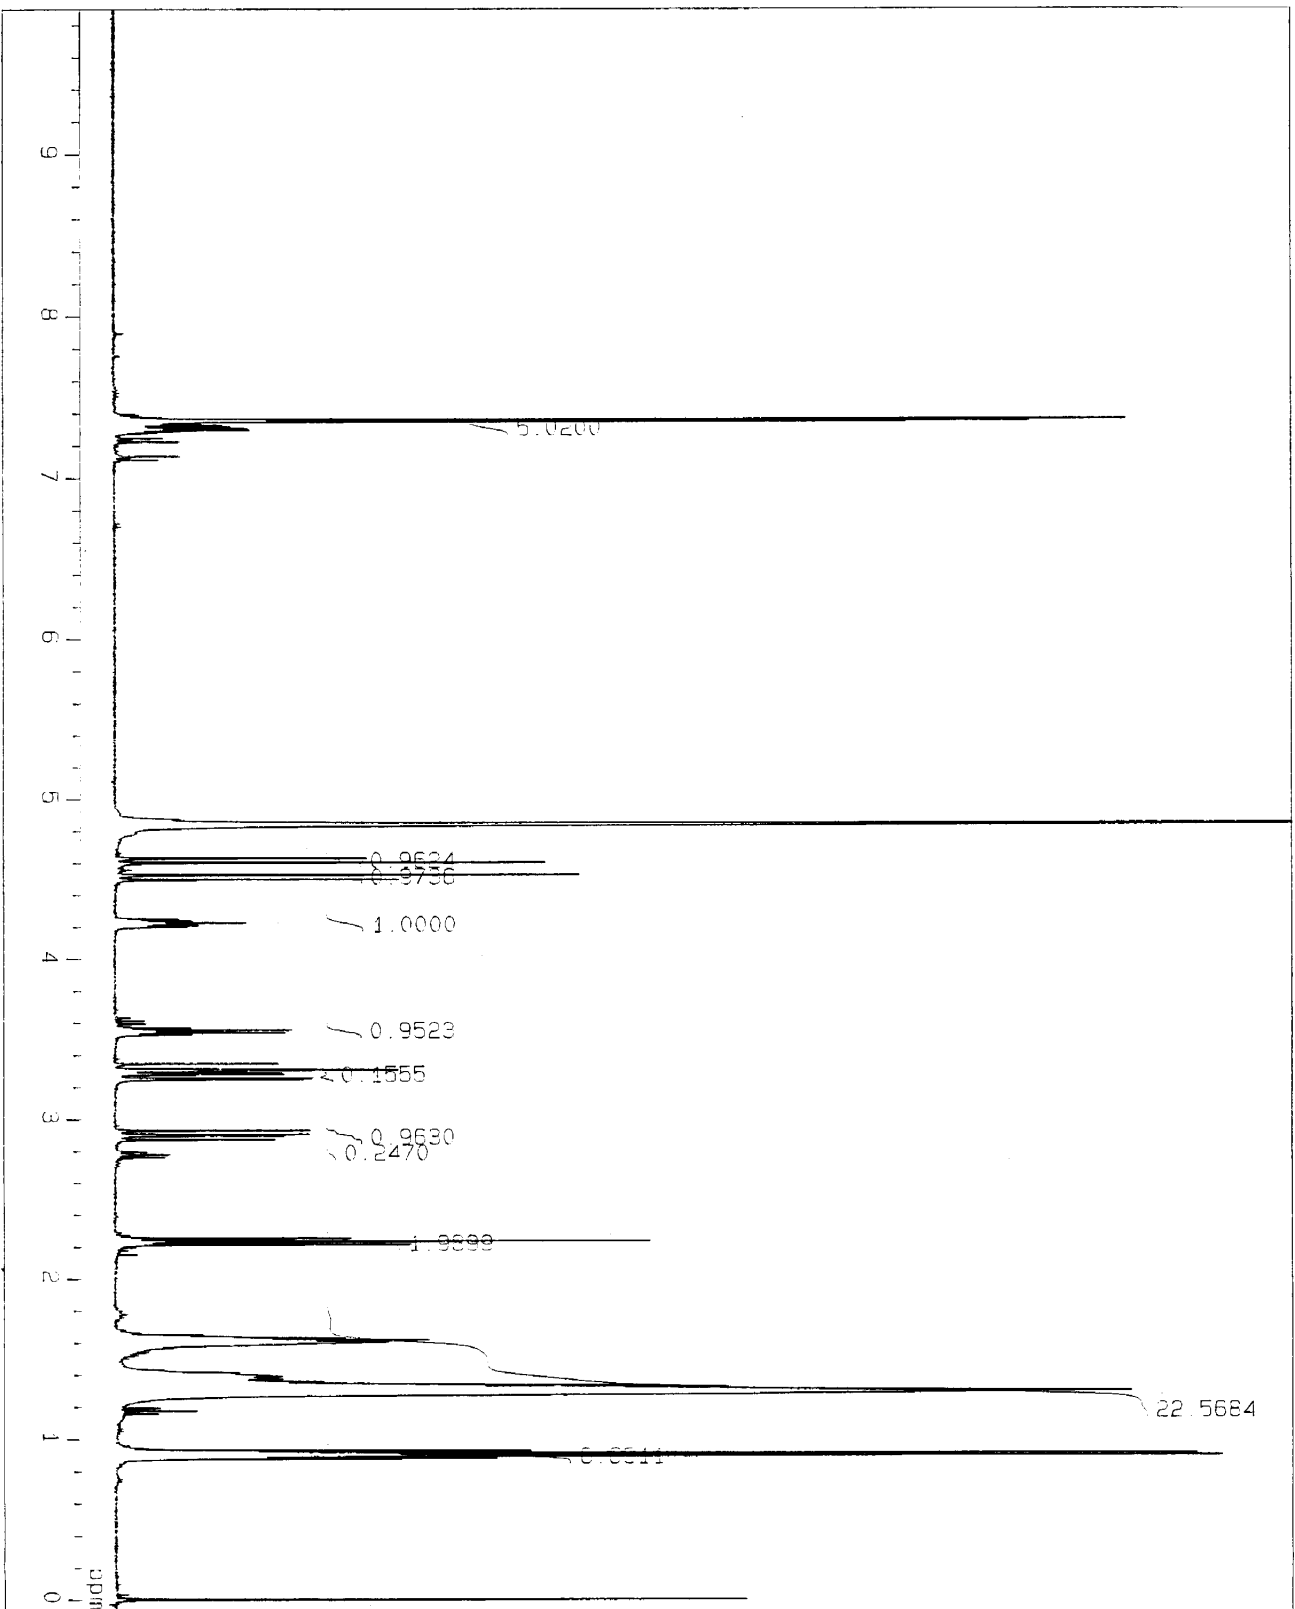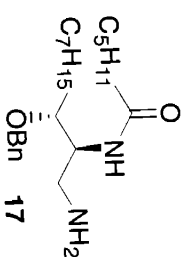

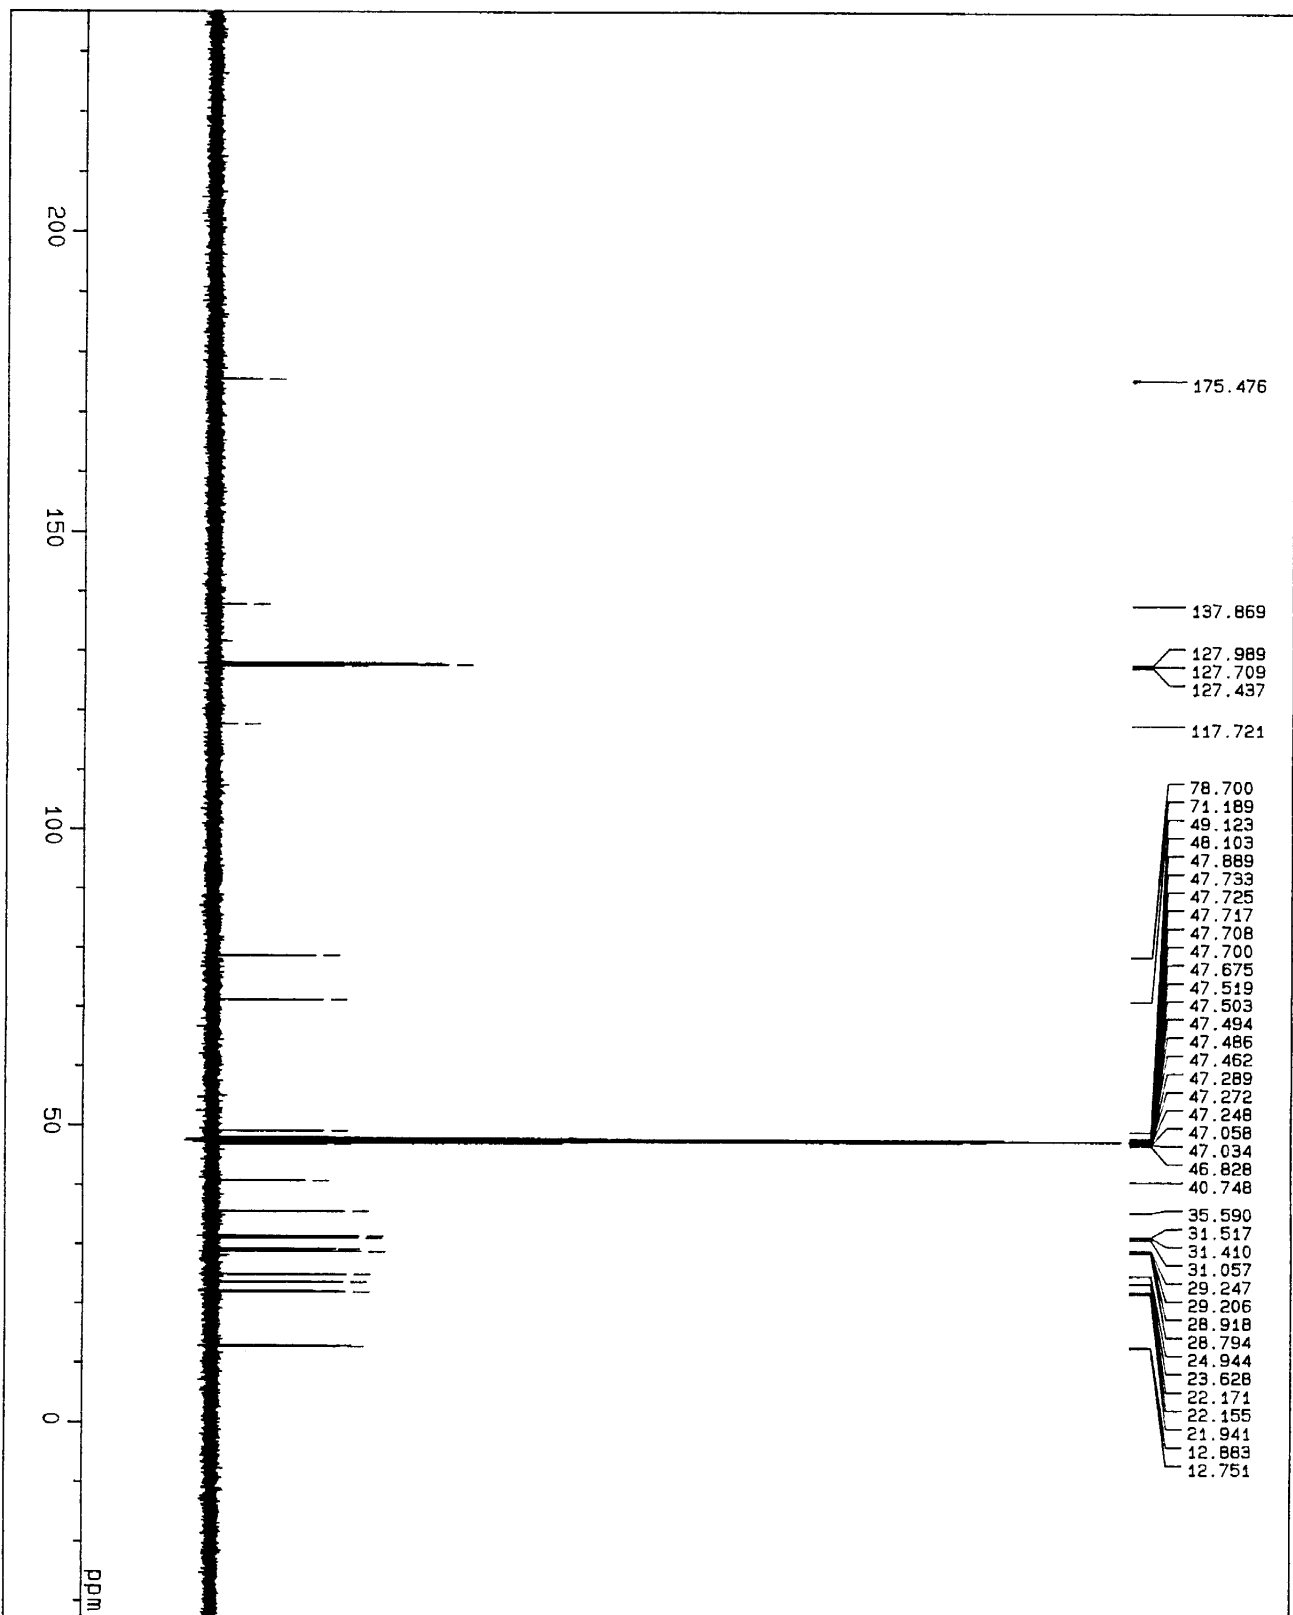

20-MAY-2002 17:43:17.17

DFILE :  
SFILE :

COMNT : KATSUMURA-LAB  
EXMOD : SINGL  
IRMOD : BCM  
POINT : 32768  
FREQU : 27100.27 Hz  
SCANS : 694  
DUMMY : 4  
ACQTM : 0.6046 sec  
PD : 0.8000 sec  
RGAIN : 23

PW1 : 5.15 usec

OBNUC : 13C  
OBFRQ : 100.40 MHz  
OBSET : 135500.00 Hz

IRNUC : 1H  
IRFRQ : 399.65 MHz  
IRSET : 134500.00 Hz  
IRATN : 511  
IRRPW : 50.0 usec  
IRBP1 : 27  
IRBP2 : 6  
IRRNS : 0

ADBIT : 16  
CTEMP : 27.2 C  
CSPED : 14 Hz  
SLVNT : CD3OD

RESOL : 0.83 Hz  
BF : 0.01 Hz  
T1 : 0.00 %  
T2 : 0.00 %  
T3 : 90.00 %  
T4 : 100.00 %  
REFVL : 49.00 ppm  
XE : 27100.27 Hz  
XS : 0.00 Hz  
operator

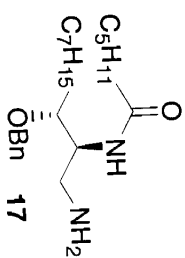

3-SEP-2002 10:07:38.99

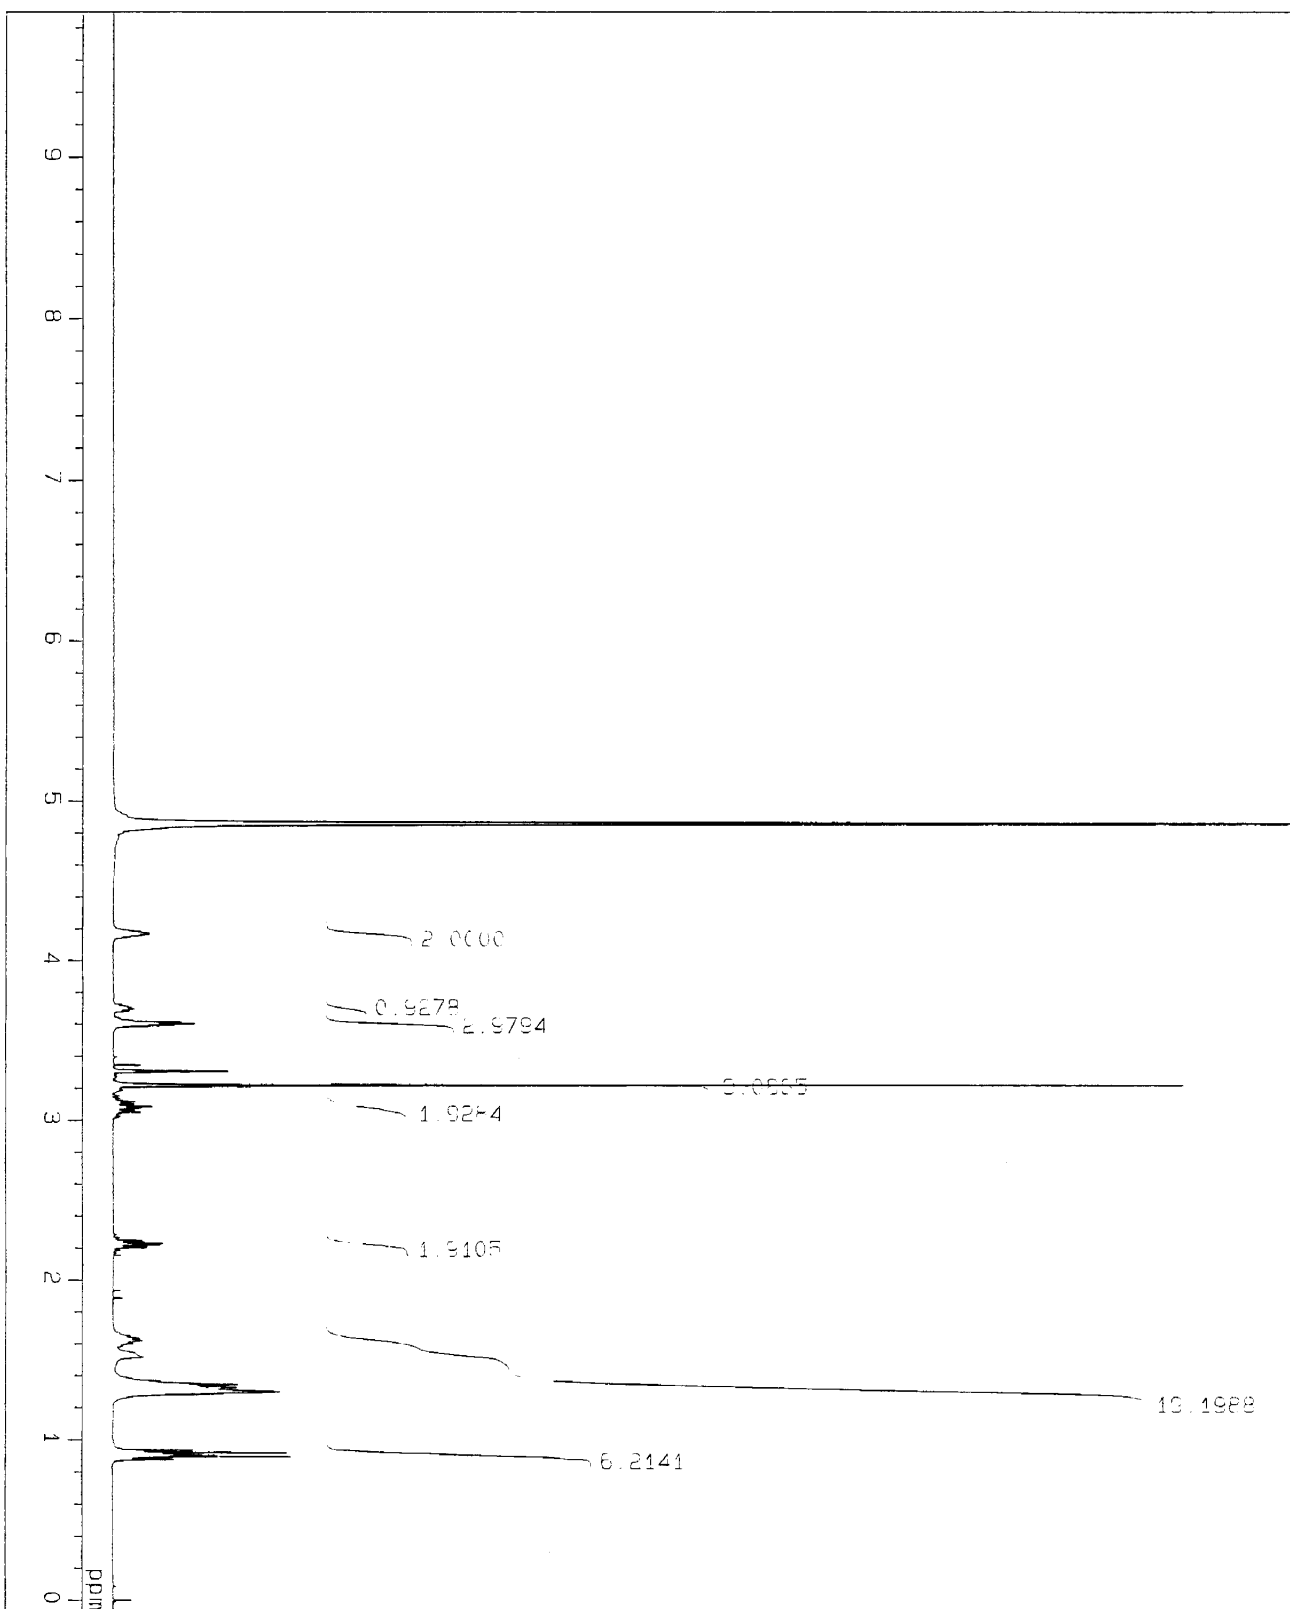

DFILE :  
 SFILE :  
 COMNT : KATSUMURA-LAB  
 EXMOD : SINGL  
 IRMOD : NON  
 POINT : 32768  
 FREQU : 7993.61 Hz  
 SCANS : 8  
 DUMMY : 4  
 ACQTM : 4.0993 sec  
 PD : 2.9007 sec  
 RGAIN : 17  
 PM1 : 5.50 usec

OBNUC : <sup>1</sup>H  
 OBFRQ : 399.65 MHz  
 OBSET : 134500.00 Hz  
 IRNUC : <sup>1</sup>H  
 IRFRQ : 399.65 MHz  
 IRSET : 134500.00 Hz  
 IRATN : 511  
 IRAPW : 50.0 usec  
 IRBP1 : 27  
 IRBP2 : 6  
 IRBPS : 0  
 ADBIT : 16  
 CTEMP : 25.2 C  
 CSPED : 11 Hz  
 SLVNT : CD3OD  
 RESOL : 0.24 Hz  
 BF : 0.01 Hz  
 T1 : 0.00 %  
 T2 : 0.00 %  
 T3 : 90.00 %  
 T4 : 100.00 %  
 REFVL : 0.00 ppm  
 XE : 3997.53 Hz  
 XS : 645.60 Hz  
 operator :

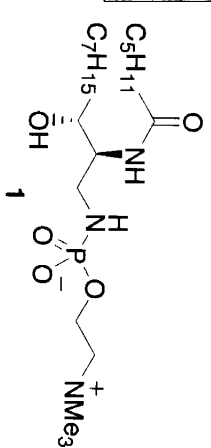

3-SEP-2002 10:20:03.11

DFILE :  
SFILE : MISA-KO-N-ANALOGUE

COMNT :  
EXMOD : SINGL  
IRMOD : BCM  
POINT : 16384  
FREQ : 27100.27 Hz  
SCANS : 5000  
DUMMY : 4  
ACQTM : 0.6046 sec  
PD : 2.3954 sec  
RGAIN : 23  
PM1 : 5.15 usec

OBNUC : <sup>13</sup>C  
OBFRQ : 100.40 MHz  
OBSET : 135500.00 Hz  
IRNUC : <sup>1</sup>H  
IRFRQ : 399.65 MHz  
IRSET : 134500.00 Hz  
IRAIN : 511  
IRAPW : 50.0 usec  
IRBP1 : 27  
IRBP2 : 6  
IRPNS : 0

ADBIT : 16  
CTEMP : 25.2 °C  
CSPED : 11 Hz  
SLVNT : CD3OD

RESOL : 1.65 Hz  
BF : 1.50 Hz  
T1 : 0.00 %  
T2 : 0.00 %  
T3 : 90.00 %  
T4 : 100.00 %  
REFVL : 49.00 ppm  
XE : 20103.56 Hz  
XS : 1205.82 Hz  
operator

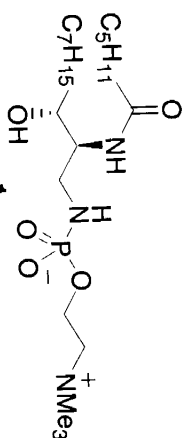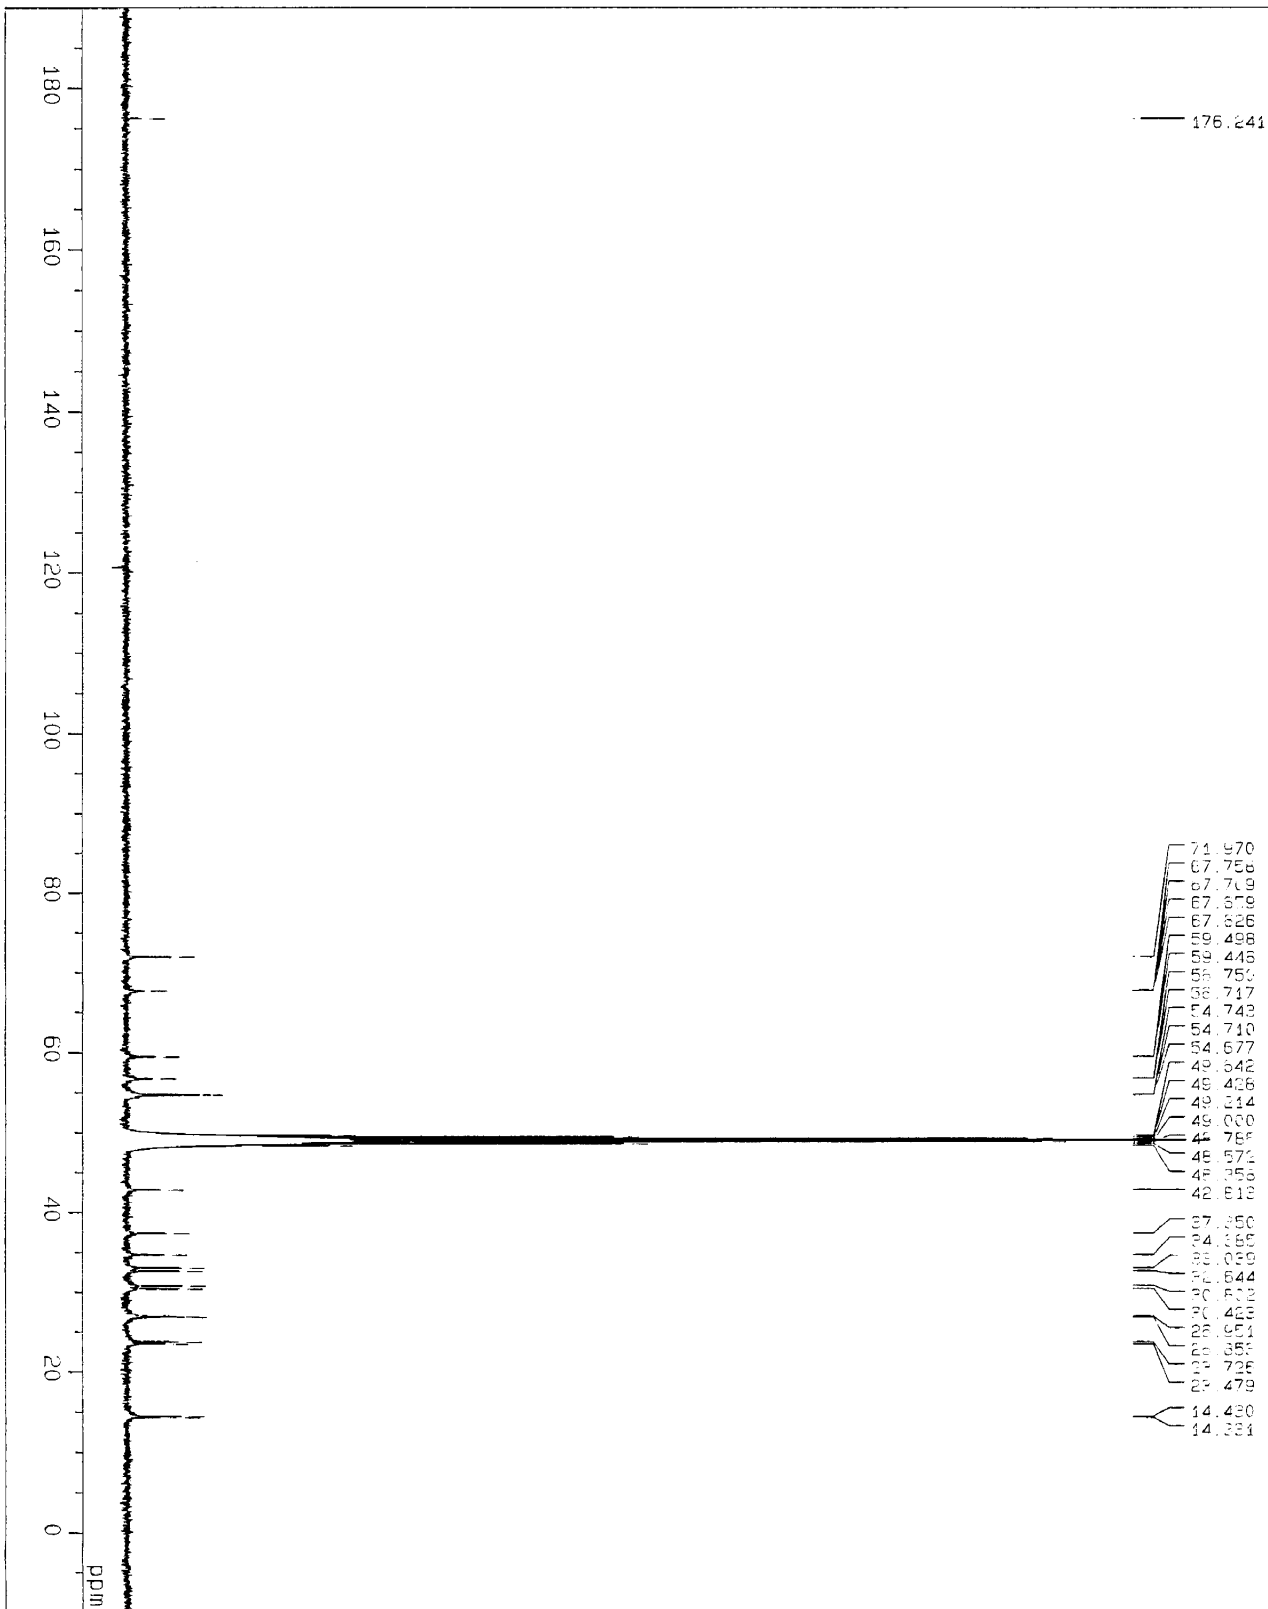

Supplement: Supplementary file 1 [file 5840598]
